# Supplementary material for: Overexpression of bla OXA-58 Gene Driven by IS Aba3 Is Associated with Imipenem Resistance in a Clinical Acinetobacter baumannii Isolate from Vietnam
Source: Hindawi journal article supplement (doi:10.1155/2020/7213429), 2020-01-01
Supplement: f1 [file 7213429.f1.pdf]

# Overexpression of *bla*<sub>OXA-58</sub> Gene Driven by IS*Aba3* is Associated with Imipenem Resistance in a Clinical *Acinetobacter baumannii* Isolate from Vietnam

Anh T. Nguyen, Son C. Pham, Anh K. Ly, Chau V.V. Nguyen, Thanh T. Vu, Tuan M. Ha

## Supplementary Material

### Tables of contents

- ❖ Figure S1. Result of imipenem E-test for five clinical isolates of *A. baumannii* (*bla*<sub>OXA-58</sub>)
- ❖ Figure S2. Electrophoresis results of PCR screening for the presence / absence of IS*Aba1*, IS*Aba2*, IS*Aba3*, IS*Aba4*, and IS18 in five clinical isolates of *A. baumannii* (*bla*<sub>OXA-58</sub>)
- ❖ Figure S3. Electrophoresis results of PCR for the presence / absence of insertion sequence (IS) upstream of *bla*<sub>OXA-58</sub> gene.
- ❖ Figure S4. Duplex real-time RT-PCR analysis of the *bla*<sub>OXA-51</sub> and *bla*<sub>OXA-58</sub> mRNA relative expression compared with 16S rRNA in five *A. baumannii* isolates.
- ❖ Figure S5. Bradford assay standard curve of concentration versus absorbance for protein quantification.
- ❖ Figure S6. Nitrocefin Standard Curve.
- ❖ Table S1. Duplex real-time RT-PCR analysis of the *bla*<sub>OXA-51</sub> and *bla*<sub>OXA-58</sub> mRNA relative expression in three *A. baumannii* isolates under conditions with oxacillin as an inducer or without oxacillin induction.
- ❖ Table S2. Results for protein quantification of supernatant and periplasmic fractions.
- ❖ Table S3. Results for  $\beta$ -lactamase activity of supernatant and periplasmic fractions.

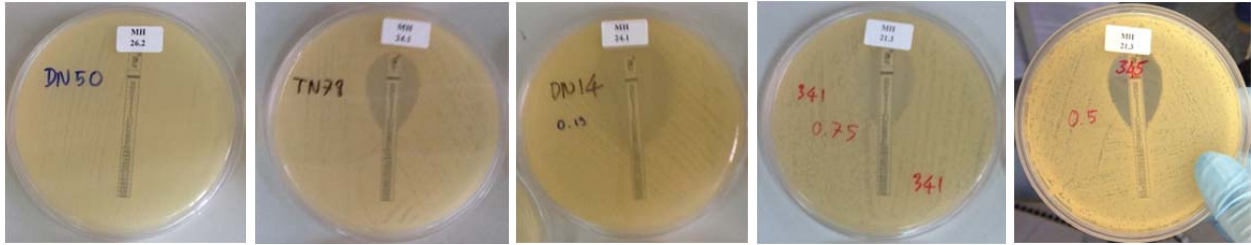

Figure S1. Result of imipenem E-test for five clinical isolates of *A. baumannii* (*bla*<sub>OXA-58</sub>)

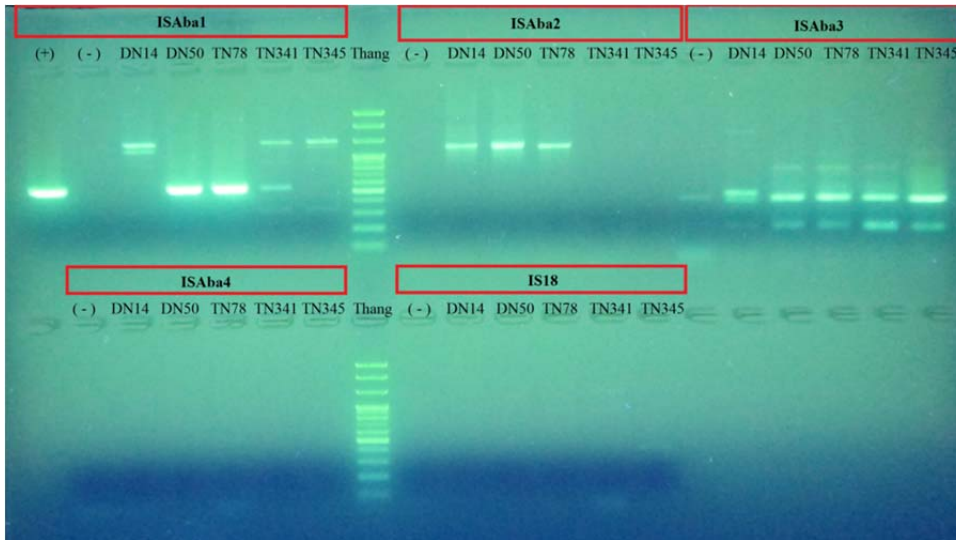

Figure S2. Electrophoresis results of PCR screening for the presence / absence of *ISAba1*, *ISAba2*, *ISAba3*, *ISAba4*, and *IS18* in five clinical isolates of *A. baumannii* (*bla*<sub>OXA-58</sub>)

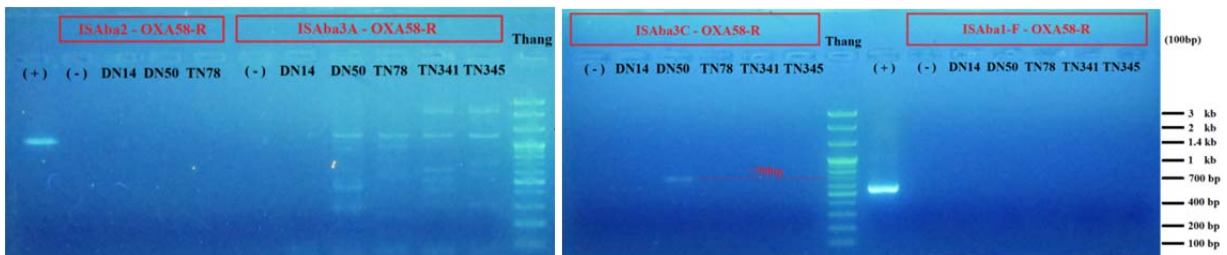

Figure S3. Electrophoresis results of PCR for the presence / absence of insertion sequence (IS) upstream of *bla*<sub>OXA-58</sub> gene.

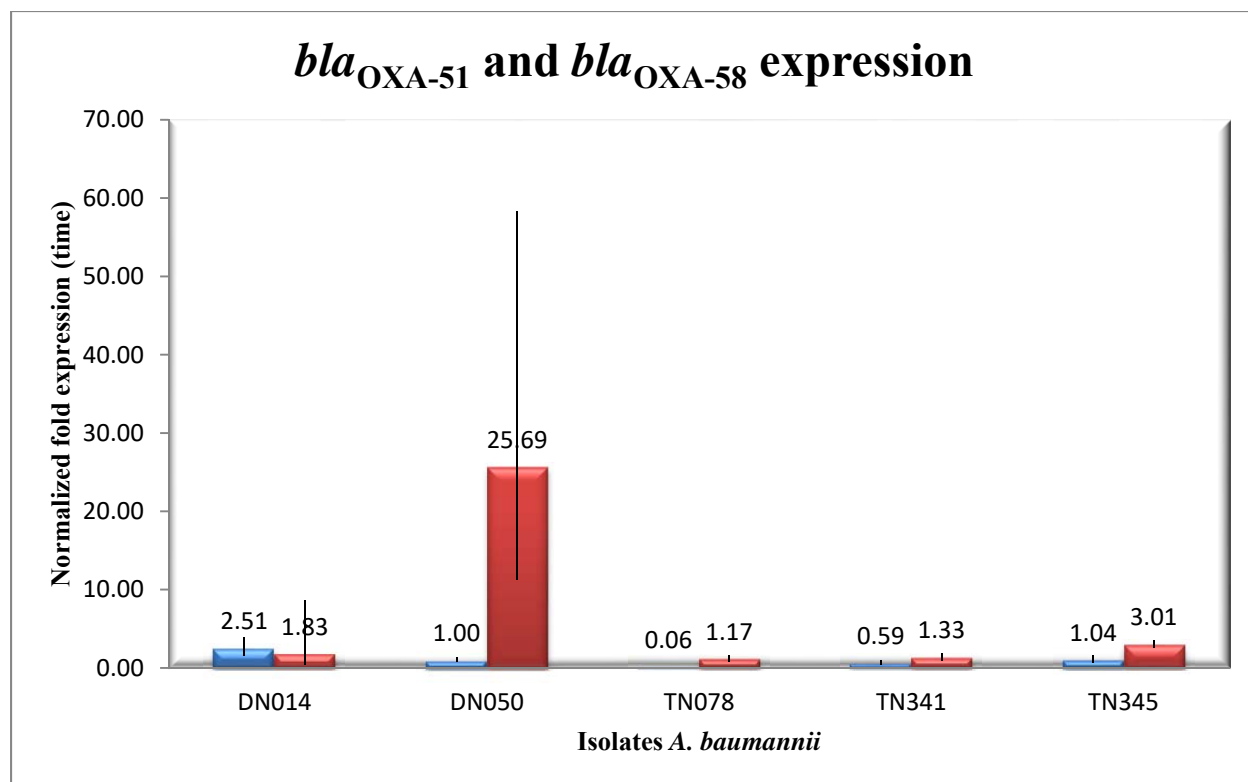

Figure S4. Duplex real-time RT-PCR analysis of the *bla*<sub>OXA-51</sub> and *bla*<sub>OXA-58</sub> mRNA relative expression normalized to 16S rRNA gene as a reference in five *A. baumannii* isolates. The expression of *bla*<sub>OXA-51</sub> in isolate DN050 is used as a calibrator. Error bars represent deviation for the normalized fold expressions of *bla*<sub>OXA-51</sub> and *bla*<sub>OXA-58</sub> in five isolates induced by oxacillin. Blue and red colours represent the expression of *bla*<sub>OXA-51</sub> and *bla*<sub>OXA-58</sub> correspondingly.

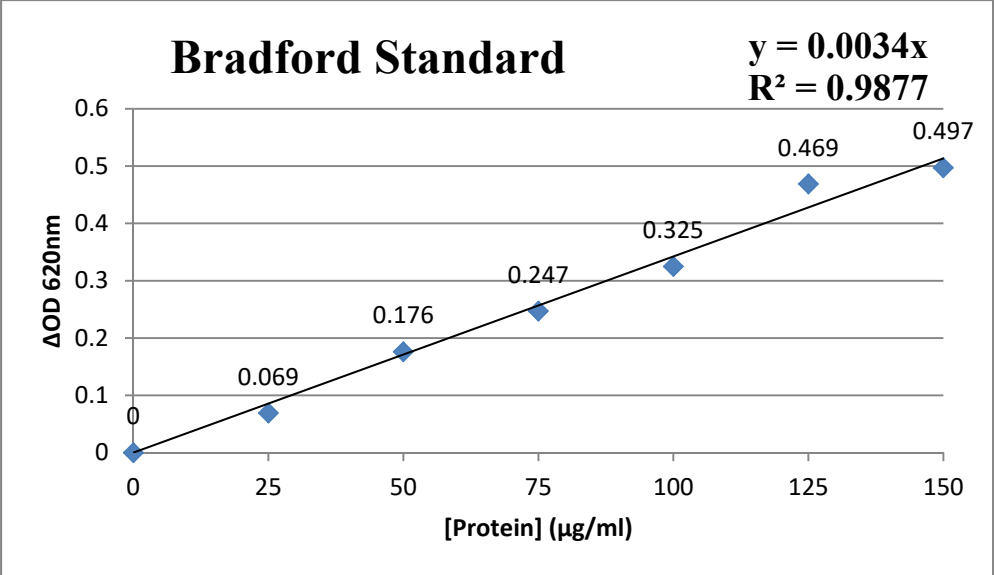

Figure S5. Bradford assay standard curve of concentration versus absorbance for protein quantification.

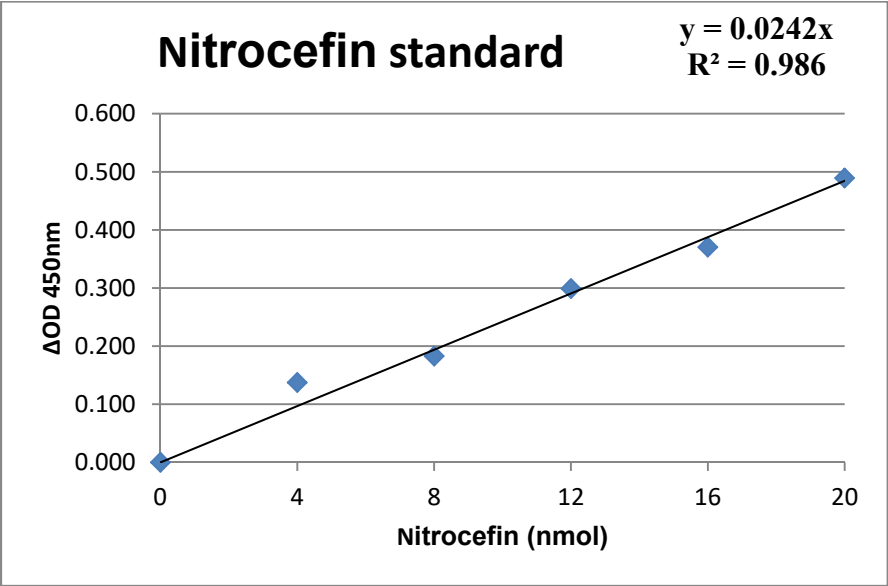

Figure S6. Nitrocefin Standard Curve

Table S1. Duplex real-time RT-PCR analysis of the *bla*<sub>OXA-51</sub> and *bla*<sub>OXA-58</sub> mRNA relative expression in three *A. baumannii* isolates under conditions with oxacillin as an inducer or without oxacillin induction. 16S rRNA gene is used as the reference for normalization and the non-induced control is run as the calibrator.

| Isolate                                                    |             | DN050 |       |      | TN341 |       |     | TN345 |       |     |
|------------------------------------------------------------|-------------|-------|-------|------|-------|-------|-----|-------|-------|-----|
|                                                            |             | Min   | Value | Max  | Min   | Value | Max | Min   | Value | Max |
| Relative expression of <i>bla</i> <sub>OXA-51</sub> (time) | Not induced | 0.4   | 1.0   | 2.3  | 1.0   | 1.0   | 1.0 | 0.9   | 1.0   | 1.1 |
|                                                            | Induced 1   | 1.9   | 4.60  | 11.2 | 0.5   | 0.9   | 1.5 | 0.1   | 0.2   | 0.4 |
|                                                            | Induced 2   | 1.8   | 3.10  | 5.6  | 0.3   | 0.7   | 1.6 | 0.8   | 1.2   | 2.0 |
|                                                            | Induced 3   | 6.5   | 7.0   | 7.6  | -     | -     | -   | -     | -     | -   |
| Relative expression of <i>bla</i> <sub>OXA-58</sub> (time) | Not induced | 0.7   | 1.0   | 1.4  | 0.8   | 1.0   | 1.2 | 0.7   | 1.0   | 1.5 |
|                                                            | Induced 1   | 10.7  | 14.4  | 19.3 | 0.3   | 0.7   | 1.5 | 0.3   | 0.5   | 0.9 |
|                                                            | Induced 2   | 15.9  | 22.3  | 31.3 | 0.3   | 0.8   | 2.0 | 0.5   | 0.6   | 0.7 |
|                                                            | Induced 3   | 16.6  | 20.1  | 24.4 | -     | -     | -   | -     | -     | -   |

Table S2. Results for protein quantification of supernatant and periplasmic fractions. The concentration of protein ( $\mu\text{g/ml}$ ) was determined using the equation  $y = 0.0034x$  with an  $R^2$  value of 0.9877, where  $y$  is absorbance and  $x$  is concentration.

| Isolate                          | DN050 | TN078 | DN014 | TN341 | TN345 |
|----------------------------------|-------|-------|-------|-------|-------|
| Supernatant ( $\mu\text{g/ml}$ ) | 58.82 | 45.29 | 37.06 | 47.94 | 45.88 |
| Periplasmic ( $\mu\text{g/ml}$ ) | 22.94 | 85.00 | 26.47 | 18.24 | 37.35 |

Table S3. Results for  $\beta$ -lactamase activity of supernatant and periplasmic fractions. The hydrolyzed Nitrocefin (nmol) generated by  $\beta$ -lactamase during the reaction time ( $\Delta T$ ) was determined using the equation  $y = 0.0242x$  with an  $R^2$  value of 0.986, where  $y$  is absorbance and  $x$  is the amount of hydrolyzed Nitrocefin. The  $\beta$ -lactamase activity of the test samples is calculated based on the formula:  $B/(\Delta T \times V) \times D$  (nmol/min/ml) or (mU/ml) where  $B$  is the amount of Nitrocefin from the Standard Curve (nmol),  $\Delta T$  is the reaction time (min),  $V$  is the sample volume added into the reaction well (ml),  $D$  is the sample dilution factor.

| Sample      | Isolate | $\Delta OD$ | $\Delta T$ (min) | B (nmol) | V (ml) | Diluted (D) | $\beta$ -lactamase activity (mU/ml) | $\beta$ -lactamase activity (mU/ $\mu\text{g}$ ) | SD   |
|-------------|---------|-------------|------------------|----------|--------|-------------|-------------------------------------|--------------------------------------------------|------|
| Supernatant | DN050   | 0.385       | 25               | 15.9     | 0.005  | 5           | 636.4                               | 10.8                                             | 3.3  |
|             | TN078   | 0.388       | 20               | 16.0     | 0.005  | 5           | 801.7                               | 17.7                                             | 5.2  |
|             | DN014   | 0.299       | 24               | 12.4     | 0.005  | 5           | 514.8                               | 13.9                                             | 4.1  |
|             | TN341   | 0.188       | 15               | 7.8      | 0.005  | 5           | 517.9                               | 10.8                                             | 3.3  |
|             | TN345   | 0.201       | 14               | 8.3      | 0.005  | 5           | 593.3                               | 12.9                                             | 3.8  |
| Periplasmic | DN050   | 0.310       | 25               | 12.8     | 0.005  | 10          | 1024.8                              | 44.7                                             | 12.8 |
|             | TN078   | 0.251       | 16               | 10.4     | 0.005  | 10          | 1296.5                              | 15.3                                             | 4.3  |
|             | DN014   | 0.219       | 24               | 9.0      | 0.005  | 10          | 754.1                               | 28.5                                             | 8.2  |
|             | TN341   | 0.197       | 18               | 8.1      | 0.005  | 10          | 904.5                               | 49.6                                             | 16.0 |
|             | TN345   | 0.124       | 10               | 5.1      | 0.005  | 10          | 1024.8                              | 27.4                                             | 10.1 |
